# Supplementary material for: 48-Month Clinical Outcomes and Prognostic Factors in an All-Comers Population with Acute Coronary Syndrome and Chronic Coronary Syndrome Undergoing Percutaneous Coronary Intervention with a Sirolimus-Eluting Stent
Source: MDPI journal article supplement (doi:10.3390/jpm13111573), 2023-11-03
Supplement: s1 [file s1]

## Supplementary Tables

**Supplementary Table S1. Univariable Cox regression for MACE**

| Characteristics   | N  | HR <sup>1</sup> | 95% CI <sup>1</sup> | p-value |
|-------------------|----|-----------------|---------------------|---------|
| Sex               | 88 |                 |                     |         |
| Male              |    | —               | —                   |         |
| Female            |    | 0.70            | 0.23, 2.17          | 0.538   |
| Age               | 88 | 1.01            | 0.97, 1.05          | 0.726   |
| CHIP              | 88 | 1.56            | 0.58, 4.20          | 0.374   |
| HBR               | 88 | 2.67            | 0.99, 7.16          | 0.052   |
| pien              | 88 | 5.30            | 1.51, 18.6          | 0.009   |
| stent_length      | 88 | 1.02            | 0.98, 1.05          | 0.403   |
| stent_diameter    | 88 | 1.52            | 0.58, 3.98          | 0.398   |
| Lesion type       | 88 |                 |                     |         |
| A/B1              |    | —               | —                   |         |
| B2/C              |    | 1.65            | 0.60, 4.54          | 0.332   |
| Calcification     | 88 | 3.49            | 0.79, 15.4          | 0.100   |
| second_stent      | 87 | 1.36            | 0.51, 3.66          | 0.539   |
| MV_predilat       | 88 | 1.32            | 0.48, 3.64          | 0.589   |
| MV_postdilat      | 88 | 2.29            | 0.85, 6.15          | 0.100   |
| SYNTAX            | 81 |                 |                     |         |
| < 23              |    | —               | —                   |         |
| 23-33             |    | 2.09            | 0.46, 9.43          | 0.338   |
| >= 33             |    | 0.00            | 0.00, Inf           | 0.999   |
| SYNTAX_II_PCI     | 81 |                 |                     |         |
| <= 21.5           |    | —               | —                   |         |
| 21.5-30.6         |    | 3.26            | 0.36, 29.2          | 0.290   |
| >= 30.6           |    | 2.02            | 0.25, 16.2          | 0.507   |
| SYNTAX_II_CABG    | 68 |                 |                     |         |
| <= 21.5           |    | —               | —                   |         |
| 21.5-30.6         |    | 0.93            | 0.17, 5.09          | 0.935   |
| >= 30.6           |    | 1.68            | 0.36, 7.92          | 0.510   |
| Euroscore_II      | 88 |                 |                     |         |
| < 3               |    | —               | —                   |         |
| 3-5               |    | 0.55            | 0.12, 2.55          | 0.444   |
| >= 5              |    | 1.45            | 0.48, 4.31          | 0.509   |
| cardiogenic_shock | 88 | 2.25            | 0.51, 9.90          | 0.284   |
| HT                | 88 | 2.83            | 0.37, 21.4          | 0.314   |
| DM                | 88 | 2.56            | 0.95, 6.89          | 0.062   |
| dyslipidemia      | 88 | 8.48            | 1.12, 64.2          | 0.039   |
| MI                | 88 | 2.17            | 0.81, 5.78          | 0.122   |
| PCI               | 88 | 3.57            | 1.29, 9.83          | 0.014   |
| CABG              | 88 | 3.29            | 0.94, 11.6          | 0.063   |
| AO                | 88 | 0.72            | 0.09, 5.42          | 0.746   |
| Stroke/TIA        | 88 | 1.53            | 0.35, 6.73          | 0.575   |
| smoke             | 88 | 1.17            | 0.43, 3.23          | 0.755   |
| CKD               | 88 | 1.70            | 0.59, 4.88          | 0.327   |

| Characteristics             | N  | HR <sup>1</sup> | 95% CI <sup>1</sup> | p-value |
|-----------------------------|----|-----------------|---------------------|---------|
| COPD                        | 88 | 2.02            | 0.46, 8.92          | 0.351   |
| medicine_clopidogrel        | 88 | 0.52            | 0.15, 1.82          | 0.307   |
| medicine_ticagrelor         | 88 | 1.92            | 0.55, 6.75          | 0.307   |
| medicine_ACEI               | 88 | 0.83            | 0.24, 2.92          | 0.776   |
| medicine_ARB                | 88 | 1.07            | 0.24, 4.71          | 0.927   |
| medicine_betabloker         | 88 | 0.63            | 0.08, 4.74          | 0.650   |
| medicine_digoxin            | 88 | 9.65            | 1.22, 76.3          | 0.032   |
| medicine_Ca_blocker         | 88 | 1.14            | 0.33, 4.01          | 0.835   |
| medicine_diuretics          | 88 | 1.90            | 0.66, 5.46          | 0.235   |
| medicine_MRA                | 88 | 1.26            | 0.44, 3.62          | 0.670   |
| medicine_NTG                | 88 | 1.74            | 0.23, 13.1          | 0.594   |
| medicine_alfa_adrenolitic   | 88 | 3.08            | 0.69, 13.7          | 0.140   |
| medicine_VKA                | 88 | 3.97            | 1.27, 12.4          | 0.018   |
| medicine_rivaroxaban        | 88 | 18.6            | 2.16, 160           | 0.008   |
| medicine_LMWH               | 88 | 1.82            | 0.24, 13.8          | 0.561   |
| medicine_IPP                | 88 | 0.76            | 0.17, 3.33          | 0.714   |
| medicine_hypoglycaemic drug | 88 | 2.21            | 0.77, 6.37          | 0.141   |
| medicine_insulina           | 88 | 0.69            | 0.16, 3.03          | 0.622   |
| echo_EF                     | 86 | 0.98            | 0.94, 1.02          | 0.260   |

<sup>1</sup>HR = Hazard Ratio; CI = Confidence Interval.

**Supplementary Table S2. Univariable Cox regression for TLR**

| Characteristics | N  | HR <sup>1</sup> | 95% CI <sup>1</sup> | p-value |
|-----------------|----|-----------------|---------------------|---------|
| Sex             | 88 |                 |                     |         |
| Male            |    | —               | —                   |         |
| Female          |    | 1.55            | 0.35, 6.91          | 0.568   |
| Age             | 88 | 1.00            | 0.94, 1.05          | 0.892   |
| CHIP            | 88 | 7.37            | 0.89, 61.3          | 0.064   |
| HBR             | 88 | 1.60            | 0.36, 7.16          | 0.537   |
| pien            | 88 | 3.98            | 0.48, 33.1          | 0.201   |
| stent_length    | 88 | 1.05            | 1.01, 1.10          | 0.008   |
| stent_diameter  | 88 | 0.86            | 0.18, 4.01          | 0.846   |
| Lesion type     | 88 |                 |                     |         |
| A/B1            |    | —               | —                   |         |
| B2/C            |    | 5.68            | 0.68, 47.1          | 0.108   |
| Calcification   | 88 | 8.85            | 1.71, 45.9          | 0.009   |
| second_stent    | 87 | 4.41            | 0.85, 22.7          | 0.076   |
| MV_predilat     | 88 | 4.86            | 0.58, 40.4          | 0.143   |
| MV_postdilat    | 88 | 2.08            | 0.47, 9.31          | 0.336   |
| SYNTAX          | 81 |                 |                     |         |
| < 23            |    | —               | —                   |         |
| 23-33           |    | 5.72            | 1.05, 31.3          | 0.044   |
| >= 33           |    | 0.00            | 0.00, Inf           | 0.999   |
| SYNTAX_II_CABG  | 68 |                 |                     |         |

| Characteristics           | N  | HR <sup>1</sup> | 95% CI <sup>1</sup> | p-value |
|---------------------------|----|-----------------|---------------------|---------|
| <= 21.5                   |    | —               | —                   |         |
| 21.5-30.6                 |    | 0.46            | 0.03, 7.33          | 0.581   |
| >= 30.6                   |    | 1.62            | 0.18, 14.5          | 0.668   |
| Euroscore_II              | 88 |                 |                     |         |
| < 3                       |    | —               | —                   |         |
| 3-5                       |    | 0.65            | 0.07, 5.77          | 0.695   |
| >= 5                      |    | 1.43            | 0.26, 7.79          | 0.681   |
| cardiogenic_shock         | 88 | 2.64            | 0.32, 21.9          | 0.369   |
| DM                        | 88 | 1.54            | 0.34, 6.89          | 0.572   |
| MI                        | 88 | 5.31            | 1.03, 27.4          | 0.046   |
| PCI                       | 88 | 5.19            | 1.01, 26.8          | 0.049   |
| CABG                      | 88 | 2.91            | 0.35, 24.2          | 0.323   |
| stroke                    | 88 | 2.00            | 0.24, 16.6          | 0.521   |
| smoker                    | 88 | 0.94            | 0.21, 4.20          | 0.936   |
| CKD                       | 88 | 1.59            | 0.31, 8.18          | 0.581   |
| COPD                      | 88 | 2.15            | 0.26, 17.9          | 0.478   |
| medicine_clopidogrel      | 88 | 0.81            | 0.10, 6.75          | 0.848   |
| medicine_ticagrelor       | 88 | 1.23            | 0.15, 10.2          | 0.848   |
| medicine_ACEI             | 88 | 0.24            | 0.03, 2.00          | 0.187   |
| medicine_ARB              | 88 | 0.80            | 0.10, 6.68          | 0.840   |
| medicine_betabloker       | 88 | 2.24            | 0.43, 11.5          | 0.336   |
| medicine_digoxin          | 88 | 1.09            | 0.21, 5.62          | 0.918   |
| medicine_Ca_blocker       | 88 | 3.31            | 0.39, 28.0          | 0.271   |
| medicine_diuretics        | 88 | 1.74            | 0.21, 14.5          | 0.607   |
| medicine_MRA              | 88 | 0.67            | 0.08, 5.54          | 0.708   |
| medicine_NTG              | 88 | 1.86            | 0.36, 9.60          | 0.458   |
| medicine_alfa_adrenolitic | 88 | 0.83            | 0.10, 6.92          | 0.866   |
| echo_EF                   | 86 | 1.01            | 0.93, 1.09          | 0.831   |

<sup>1</sup>HR = Hazard Ratio, CI = Confidence Interval
